# Supplementary material
Source: MDPI journal article supplement (https://www.mdpi.com/2071-1050/15/14/11223)
Supplement: s1 [file s1]

**Table S1. The recipe of BG-11 (Blue Green Medium).**

| Component                                 | Amount<br>(mL/L) | Stock Solution<br>(g/500 mL dH <sub>2</sub> O) |
|-------------------------------------------|------------------|------------------------------------------------|
| NaNO <sub>3</sub>                         | 100              | 7.5                                            |
| K <sub>2</sub> HPO <sub>4</sub>           | 10               | 2                                              |
| MgSO <sub>4</sub> ·7H <sub>2</sub> O      | 10               | 3.75                                           |
| CaCl <sub>2</sub> ·2H <sub>2</sub> O      | 10               | 1.8                                            |
| Citric acid                               | 10               | 0.3                                            |
| Ferric ammonium citrate                   | 10               | 0.3                                            |
| EDTANa <sub>2</sub>                       | 10               | 0.05                                           |
| Na <sub>2</sub> CO <sub>3</sub>           | 10               | 1.0                                            |
| A <sub>5</sub> (Trace metal<br>solution ) | 1                | Mixture of trace<br>metals                     |

**Adjust PH to 7.1 with 1M NaOH or HCl**

**Table S2. The recipe of Mixture of trace metals.**

| Component                                             | Stock Solution (g/L dH <sub>2</sub> O) |
|-------------------------------------------------------|----------------------------------------|
| H <sub>3</sub> BO <sub>3</sub>                        | 2.86                                   |
| MnCl <sub>2</sub> ·4H <sub>2</sub> O                  | 1.86                                   |
| ZnSO <sub>4</sub> ·7H <sub>2</sub> O                  | 0.22                                   |
| Na <sub>2</sub> MoO <sub>4</sub> ·2H <sub>2</sub> O   | 0.22                                   |
| CuSO <sub>4</sub> ·5 H <sub>2</sub> O                 | 0.22                                   |
| Co(NO <sub>3</sub> ) <sub>2</sub> ·6 H <sub>2</sub> O | 0.22                                   |

**Table S3. The instruments and chemicals employed in the experiment.**

| <b>Number</b> | <b>Name</b>                                      | <b>Type</b>       | <b>Supplier</b>                                    |
|---------------|--------------------------------------------------|-------------------|----------------------------------------------------|
| 1             | Scanning Electron Microscopy                     | S4800             | HITACHI                                            |
| 2             | Fourier Transform Infrared Spectroscopy          | NicoletIS50       | Thermo Fisher Scientific                           |
| 3             | UV-Spectrometer                                  | UV-8000S          | Shanghai Yidian Analytical Instrument Co., Ltd     |
| 4             | Intelligent Light Incubator                      | GRH-350           | Changzhou Putian Instrument Manufacturing Co., LTD |
| 5             | High Speed Refrigerant Centrifuge                | HC-3018R          | Changsha Xiangzhi centrifuge Instrument Co., LTD   |
| 6             | Vertical Flow Clean Bench                        | SW-CJ-1FD         | Suzhou Boler purification equipment Co., LTD       |
| 7             | Freeze Dryer                                     | SCIENTN-10N       | Ningbo Xinzhi Biotechnology Co., LTD               |
| 8             | Fluorescence Spectrometer                        | F-7000            | HITACHI                                            |
| 9             | Autoclave                                        | SN 310C           | YAMATO                                             |
| 10            | Ultrasonic Cell Disrupter System                 | SCIENTN-II D      | Ningbo Xinzhi Biotechnology Co., LTD               |
| 11            | Fluorescence Microscope                          | BX41              | Olympus                                            |
| 12            | Pipettor                                         | 100 $\mu$ L-10 ml | Eppendorf                                          |
| 13            | PS-MPs                                           | 5 $\mu$ m         | Tianjin Base Line Chrom Tech Research Centre       |
| 14            | The assay kits for SOD, MDA and Soluble proteins | /                 | Shinuoda Biological Technology Co., Ltd            |

|    |                                                     |   |                                          |
|----|-----------------------------------------------------|---|------------------------------------------|
| 15 | $\text{NaNO}_3$                                     | / | Shanghai Macklin Biochemical Co.,<br>Ltd |
| 16 | $\text{K}_2\text{HPO}_4$                            | / | Shanghai Macklin Biochemical Co.,<br>Ltd |
| 17 | $\text{MgSO}_4 \cdot 7\text{H}_2\text{O}$           | / | Shanghai Macklin Biochemical Co.,<br>Ltd |
| 18 | $\text{MgSO}_4 \cdot 7\text{H}_2\text{O}$           | / | Shanghai Macklin Biochemical Co.,<br>Ltd |
| 19 | $\text{CaCl}_2 \cdot 2\text{H}_2\text{O}$           | / | Shanghai Macklin Biochemical Co.,<br>Ltd |
| 20 | Citric acid                                         | / | Shanghai Macklin Biochemical Co.,<br>Ltd |
| 21 | Ferric ammonium citrate                             | / | Shanghai Macklin Biochemical Co.,<br>Ltd |
| 22 | $\text{EDTANa}_2$                                   | / | Shanghai Macklin Biochemical Co.,<br>Ltd |
| 23 | $\text{Na}_2\text{CO}_3$                            | / | Shanghai Macklin Biochemical Co.,<br>Ltd |
| 24 | $\text{H}_3\text{BO}_3$                             | / | Shanghai Macklin Biochemical Co.,<br>Ltd |
| 25 | $\text{MnCl}_2 \cdot 4\text{H}_2\text{O}$           | / | Shanghai Macklin Biochemical Co.,<br>Ltd |
| 26 | $\text{ZnSO}_4 \cdot 7\text{H}_2\text{O}$           | / | Shanghai Macklin Biochemical Co.,<br>Ltd |
| 27 | $\text{Na}_2\text{MoO}_4 \cdot 2\text{H}_2\text{O}$ | / | Shanghai Macklin Biochemical Co.,<br>Ltd |
| 28 | $\text{CuSO}_4 \cdot 5 \text{H}_2\text{O}$          | / | Shanghai Macklin Biochemical Co.,<br>Ltd |

|    |                                                       |   |                                          |
|----|-------------------------------------------------------|---|------------------------------------------|
| 29 | $\text{Co}(\text{NO}_3)_2 \cdot 6 \text{H}_2\text{O}$ | / | Shanghai Macklin Biochemical Co.,<br>Ltd |
| 30 | Acetone                                               | / | Shanghai Macklin Biochemical Co.,<br>Ltd |
| 31 | Glutaraldehyde                                        | / | Shanghai Macklin Biochemical Co.,<br>Ltd |
| 32 | PBS                                                   | / | Shanghai Macklin Biochemical Co.,<br>Ltd |
| 33 | Fluorescein diacetate                                 | / | Shanghai Macklin Biochemical Co.,<br>Ltd |

---

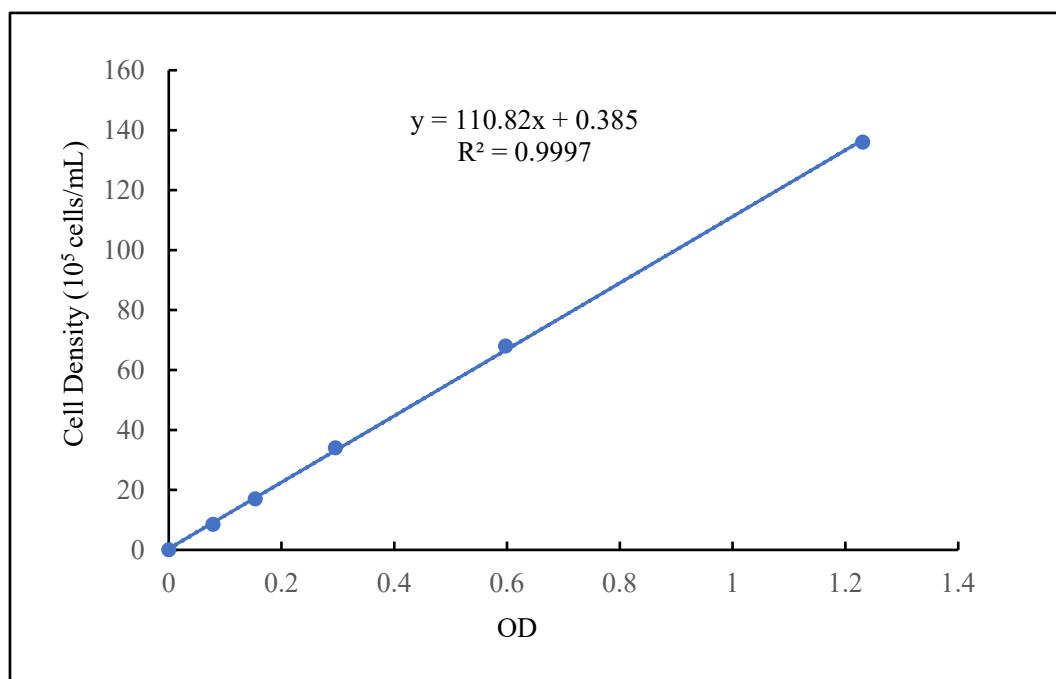

**Figure S1.** The relationships between optical density and Cell Density of microalgae.
